# Supplementary material
Source: Royal Society of Chemistry journal article supplement (doi:10.1039/d6nh00093b)
Supplement: d6nh00093b1.pdf [file d6nh00093b1.pdf]

## Supporting Information

### **Polypyridi-nophane Thin Films via CVD process for Polymeric Dielectric Layer on Oxide TFT with Ultra-high Dielectric Constant**

Won Kyung Park,<sup>a†</sup> Jae Won Park,<sup>b†</sup> Gunoh Lee,<sup>a</sup> SeongCheol Jang,<sup>\* b</sup> Hyun-Suk Kim<sup>\*b</sup> and Kyung Jin Lee<sup>\*a</sup>

<sup>a</sup>. Department of Chemical Engineering and Applied Chemistry, College of Engineering, Chungnam National University, 34134, Republic of Korea, E-mail: [kjlee@cnu.ac.kr](mailto:kjlee@cnu.ac.kr).

<sup>b</sup>. Department of Energy and Materials Engineering, Dongguk University, 04620, Republic of Korea, E-mail: [jangsc215@gmail.com](mailto:jangsc215@gmail.com), [khs3297@dongguk.edu](mailto:khs3297@dongguk.edu).

† These authors equally contributed to this work.

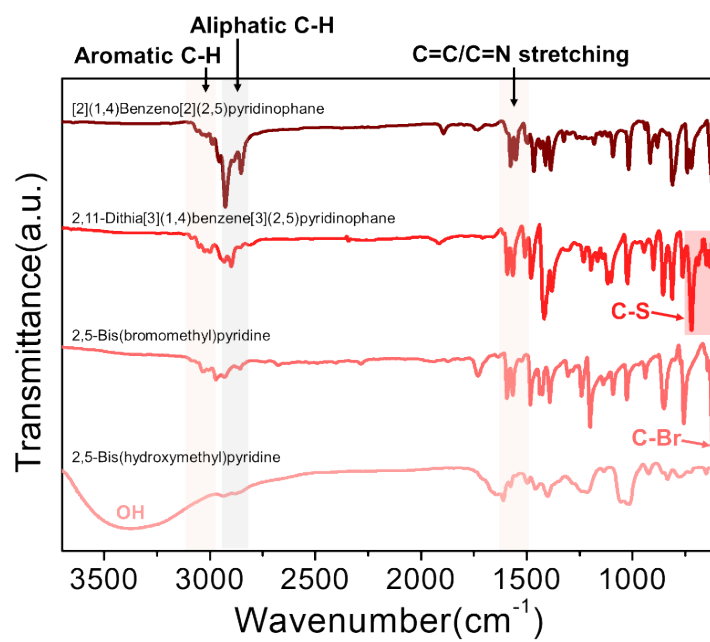

**Figure S1.** FT-IR spectrum of all synthetic step dimers

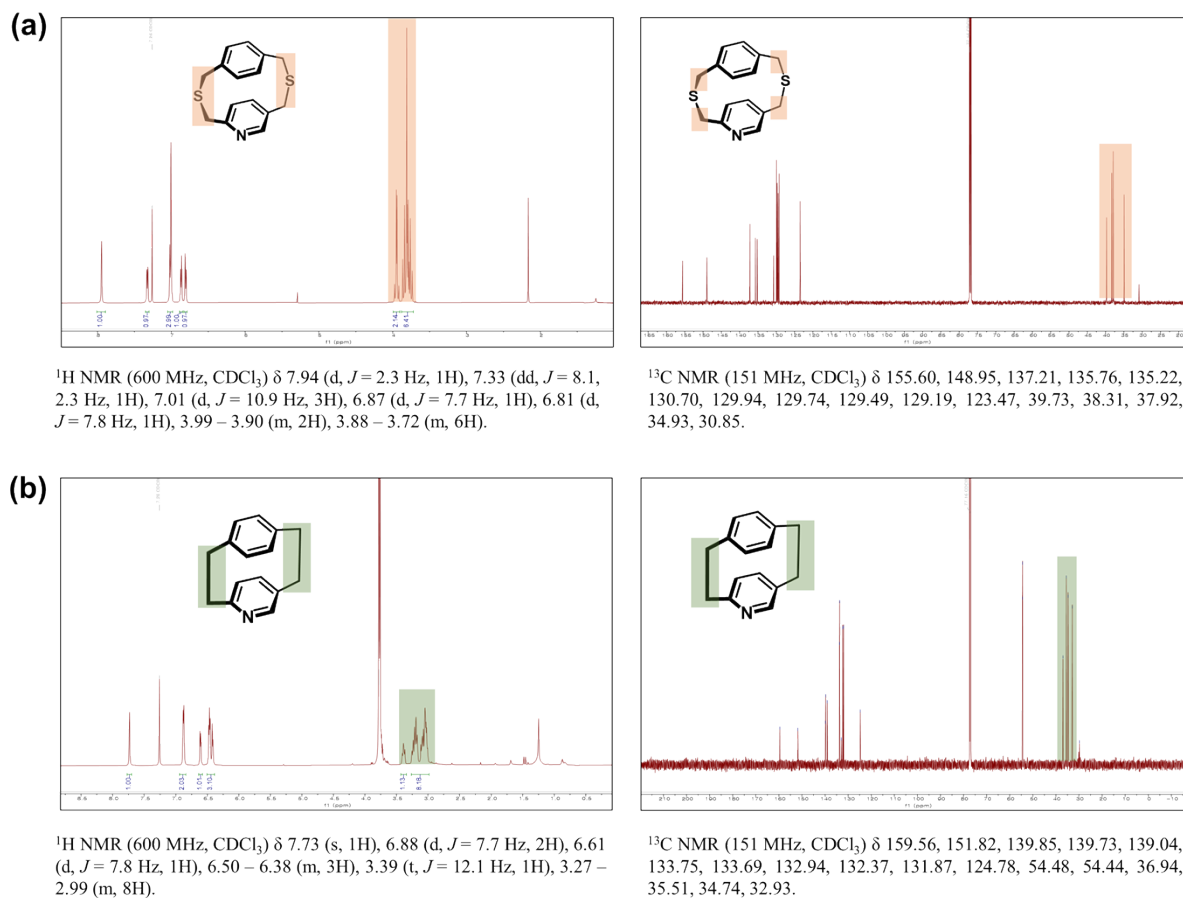

**Figure S2.**  $^1\text{H}$ -NMR and  $^{13}\text{C}$ -NMR spectrum of dimer (a) (rac)-2,11-Dithia[3](1,4)benzene[3]-(2,5)pyridinophane (Dithia-PyP) (b) (rac)-[2](1,4)benzene[2](2,5)pyridinophane (PyP)

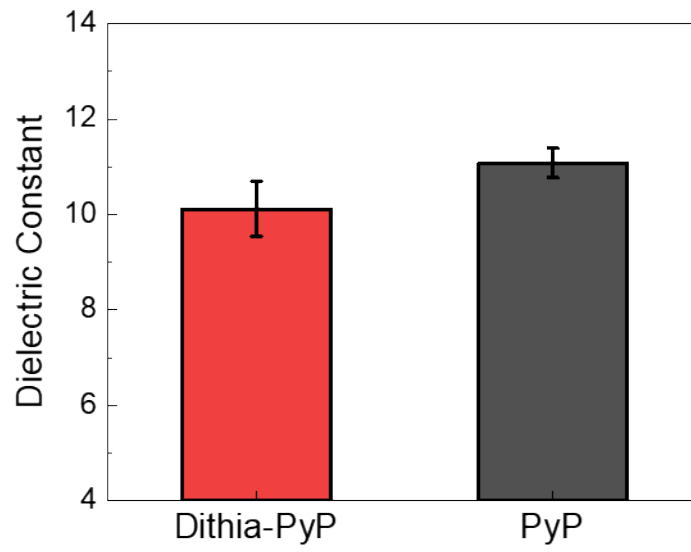

**Fig. S3.** Statistical distribution of dielectric constants extracted from nine MIM capacitors. Average dielectric constants of  $10.12 \pm 0.58$  and  $11.08 \pm 0.31$  were obtained for the Dithia-PyP and PyP dielectric films, respectively. The error bars represent the standard deviation calculated from nine devices.

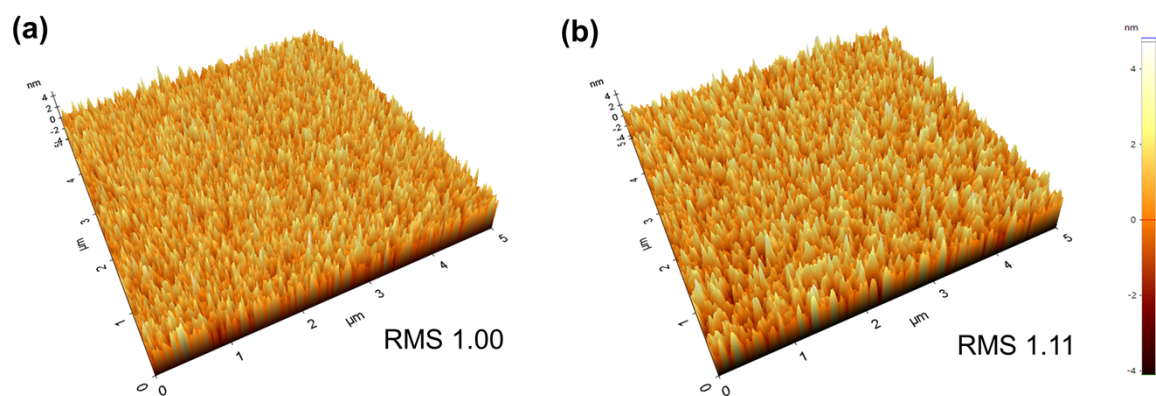

**Figure S4.** AFM images of each polymer on Si wafer with 50 nm thickness (a) Dithia-PyP and (b) PyP.
